# Supplementary material for: Ribosylation triggering Alzheimer’s disease-like Tau hyperphosphorylation via activation of CaMKII
Source: PubMed Central journal article supplement (PMC4568963; doi:10.1111/acel.12355), 2015-06-11

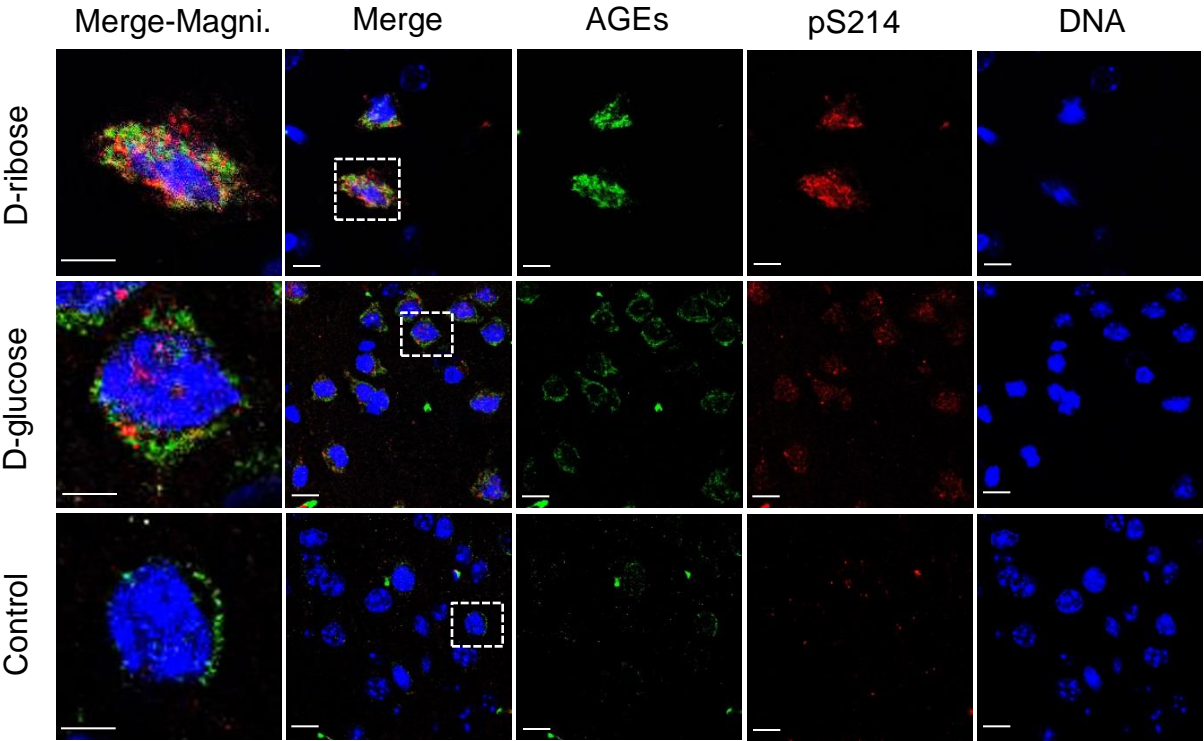

Bars=20  $\mu$ m

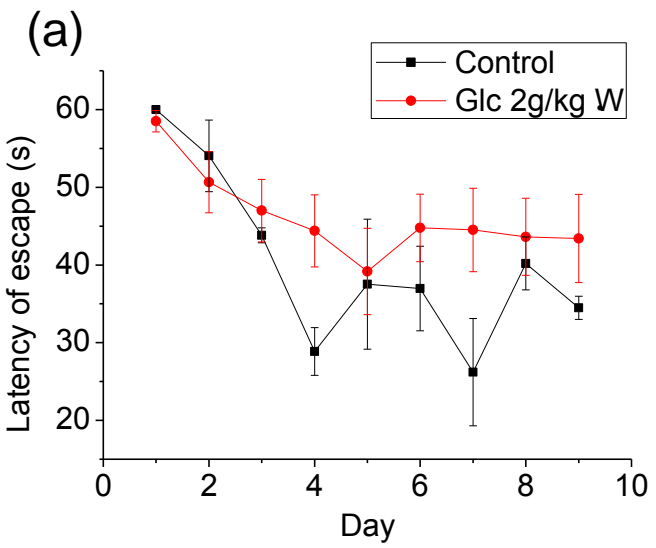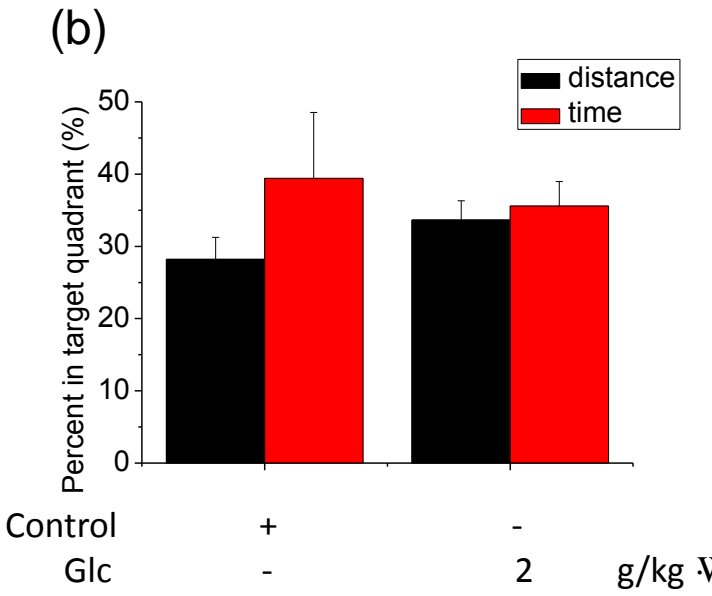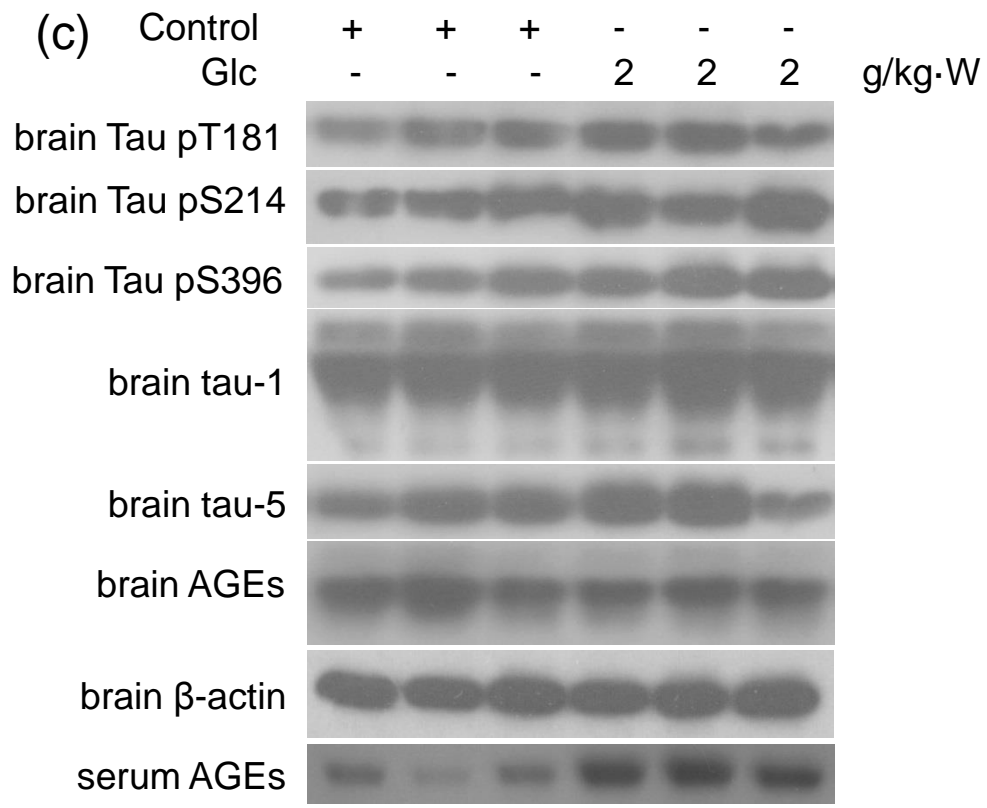

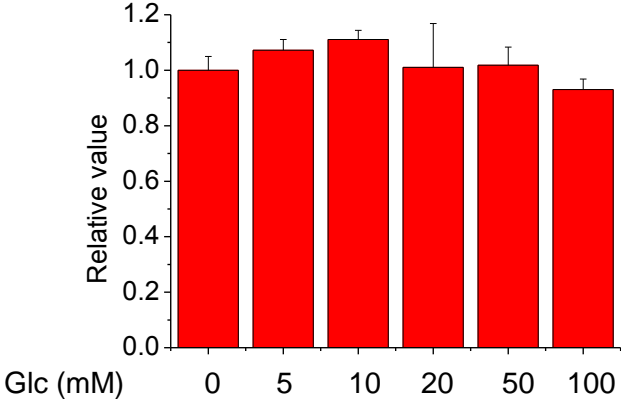

# Supplementary Figure 4

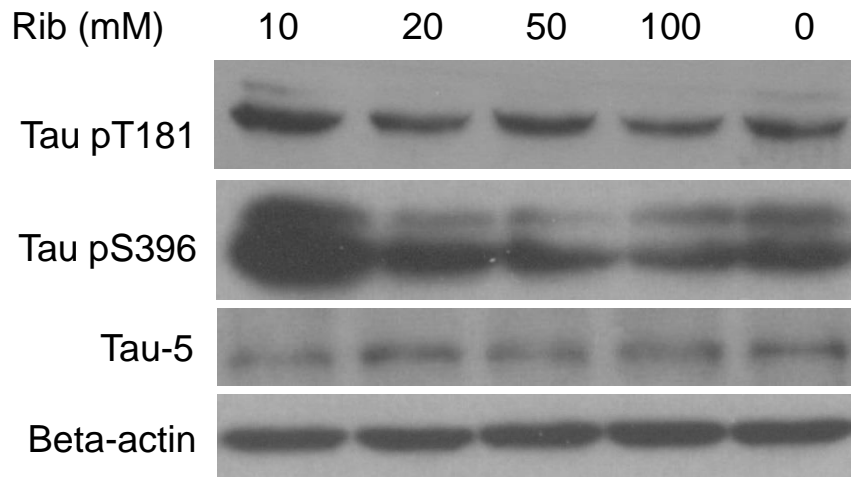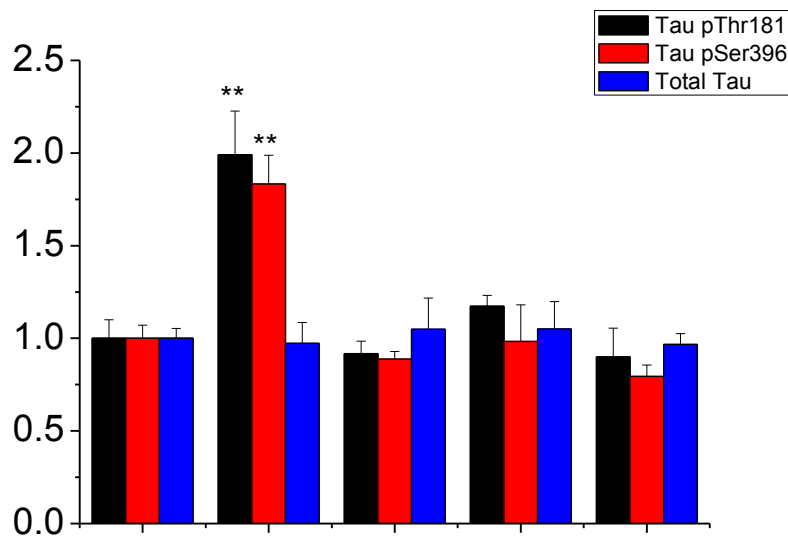

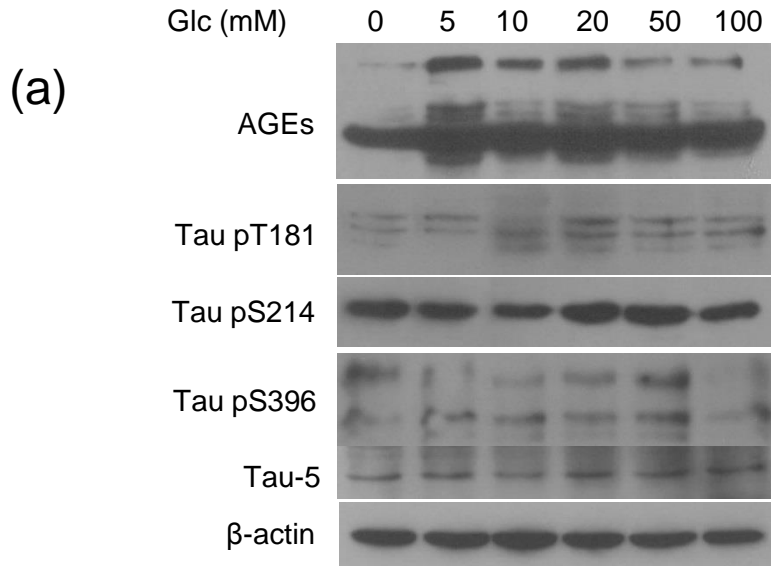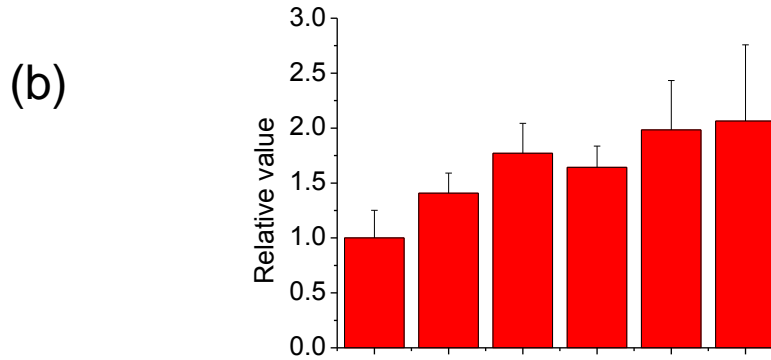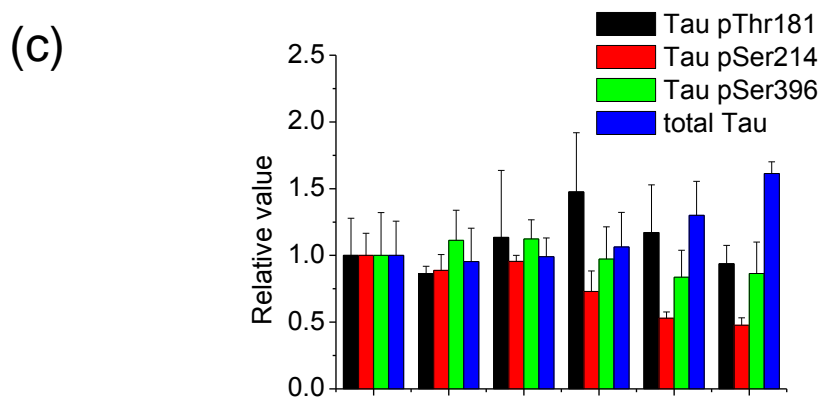

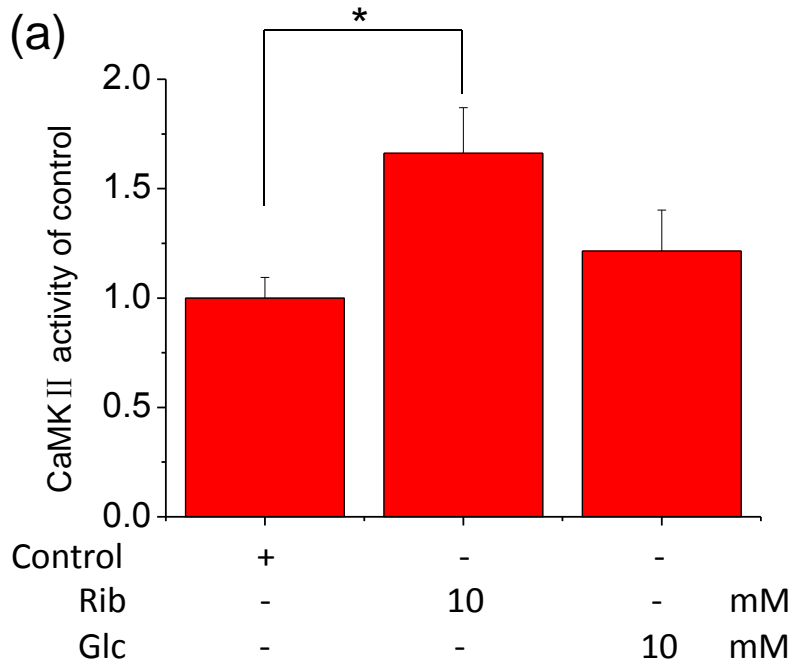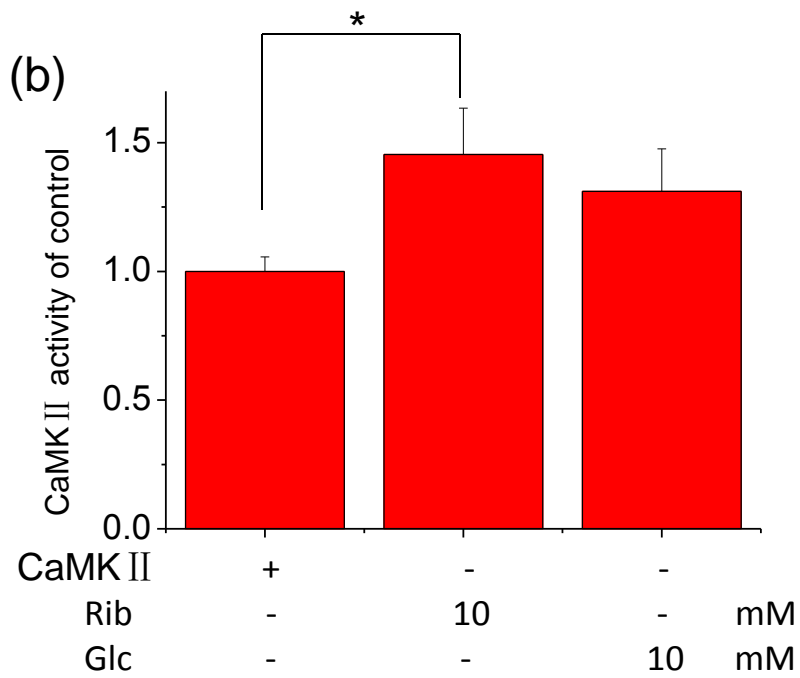

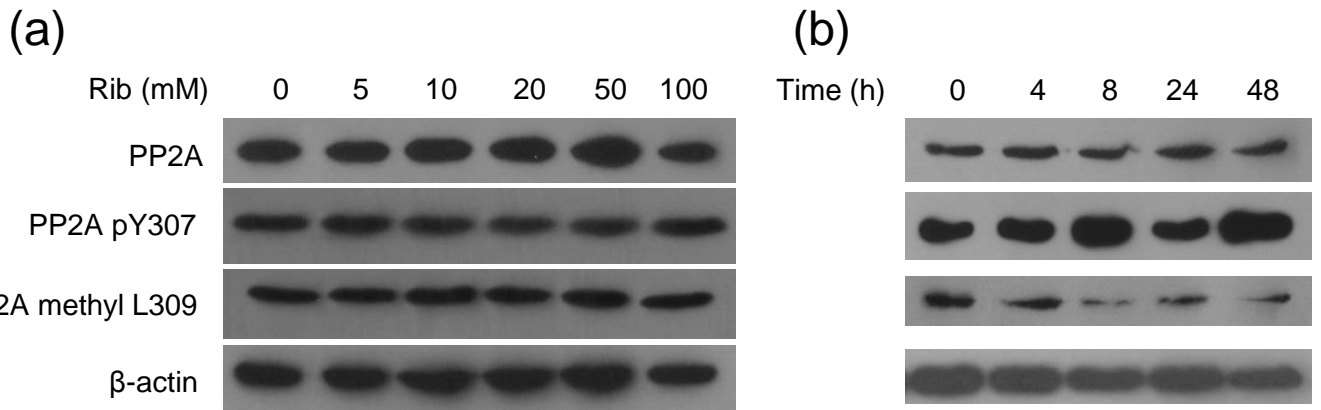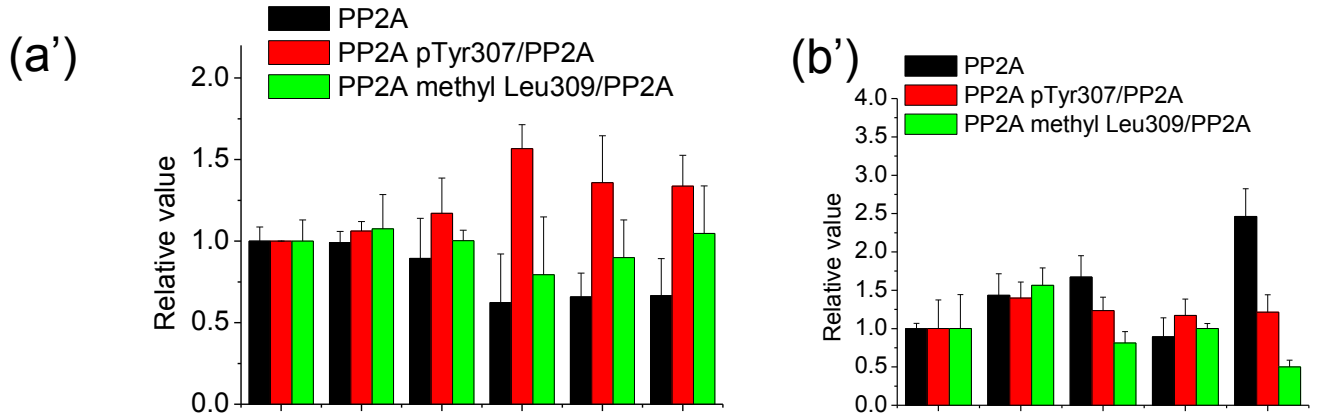

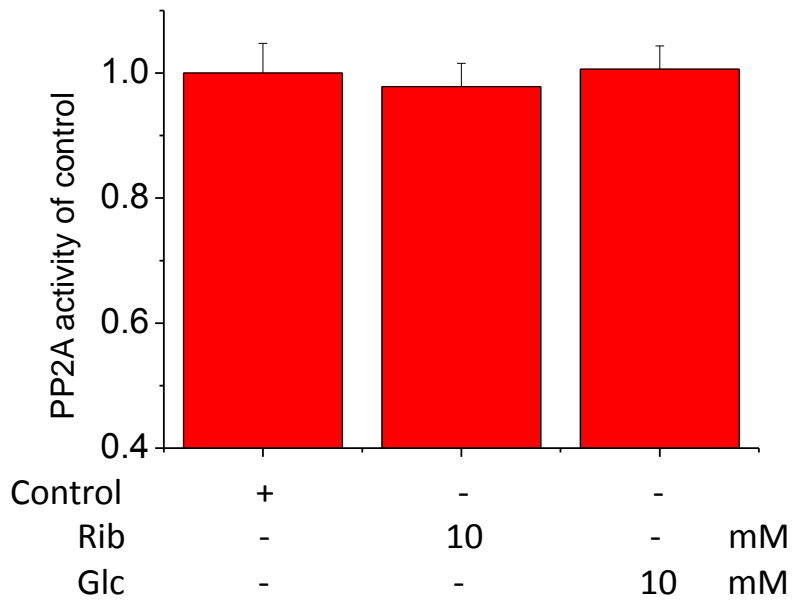



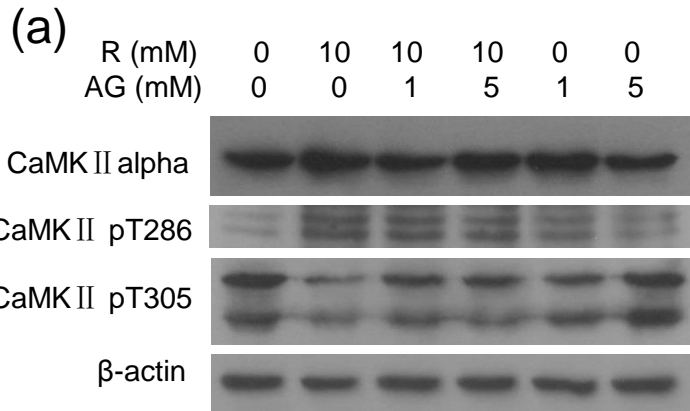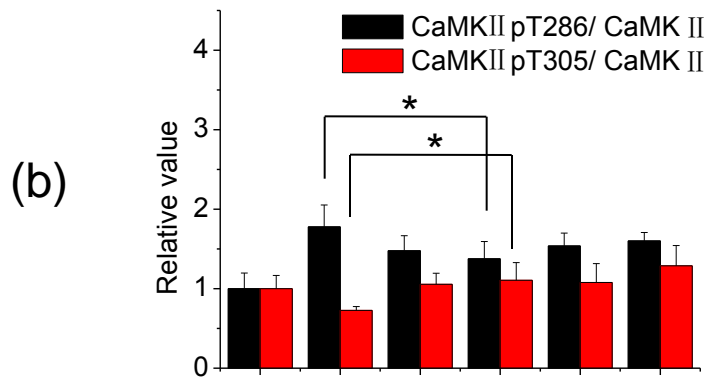

# Supplementary Figure 10

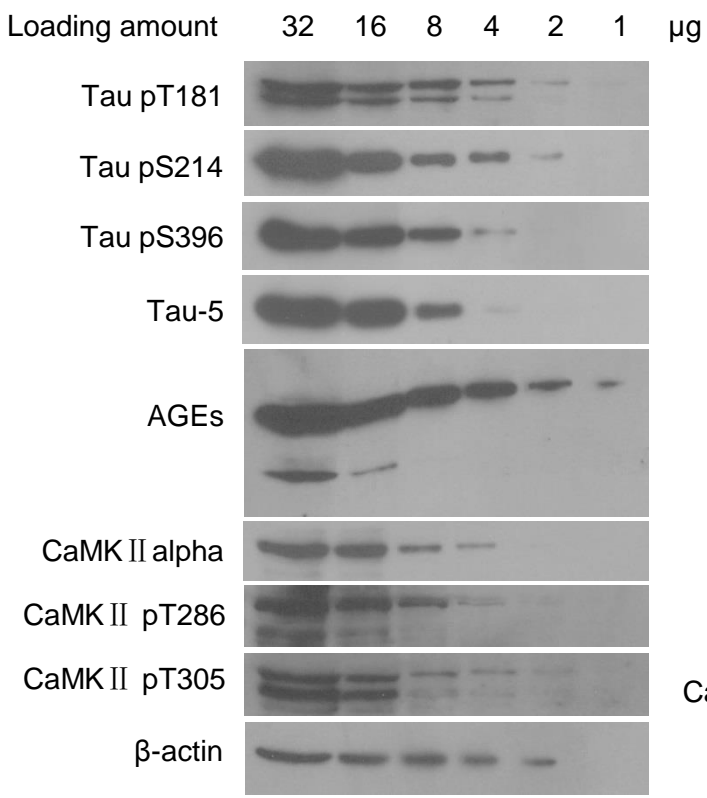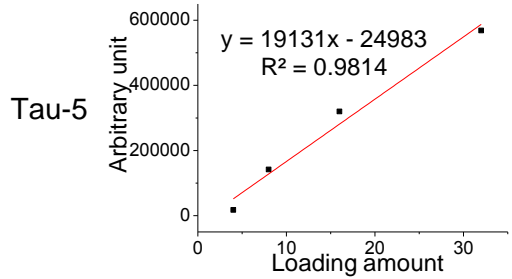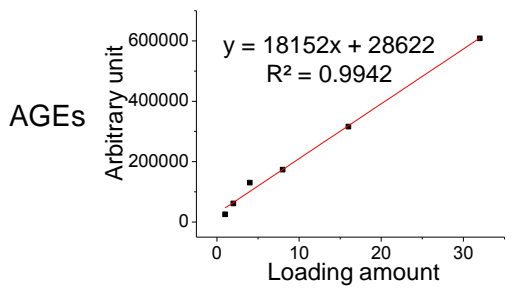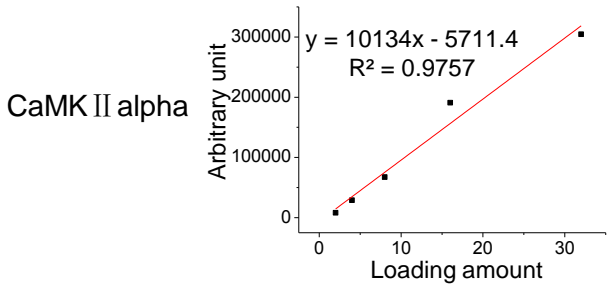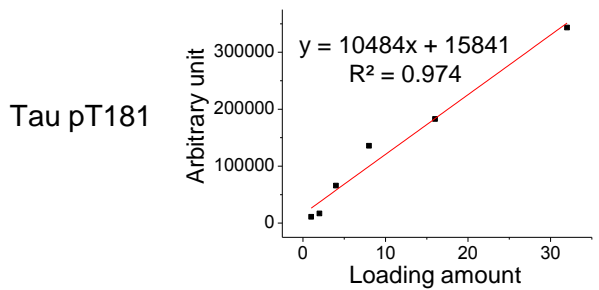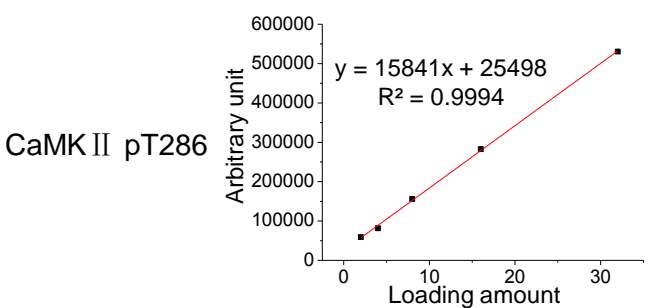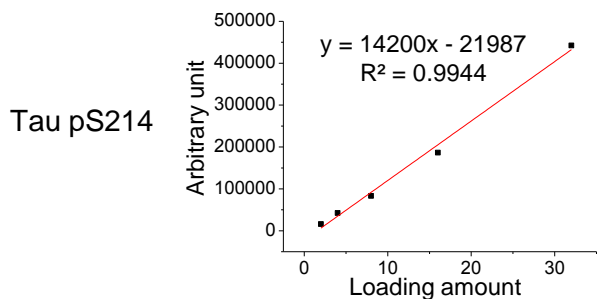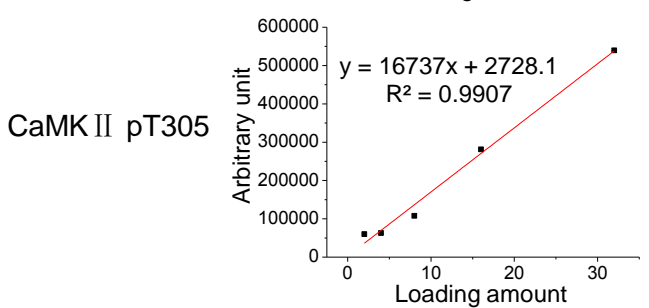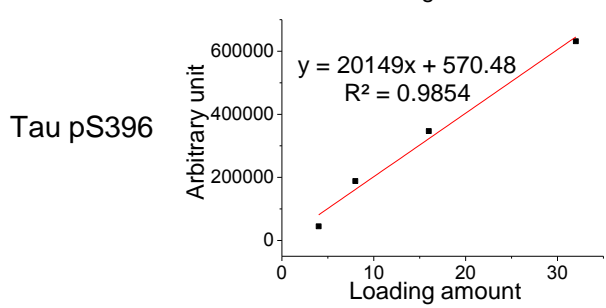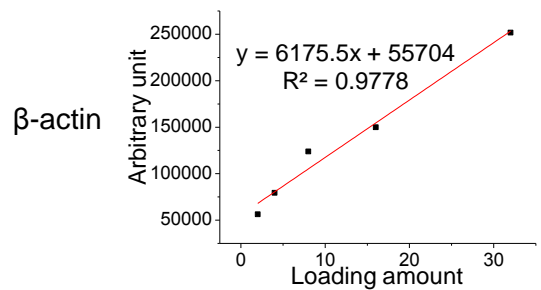

Supplement: acel0014-0754-sd1.pdf [file acel0014-0754-sd1.pdf]
